# Supplementary material for: Shanghai Preconception Cohort (SPCC) for the association of periconceptional parental key nutritional factors with health outcomes of children with congenital heart disease: a cohort profile
Source: PubMed Central journal article supplement — BMJ Open. 2019 Nov 24;9(11):e031076. doi: 10.1136/bmjopen-2019-031076 (PMC6887077; doi:10.1136/bmjopen-2019-031076), 2019-11-24
Supplement: bmjopen-2019-031076supp002.pdf [file bmjopen-2019-031076supp002.pdf]

## Appendix 2a pre-pregnant questionnaire

姓名 Name : \_\_\_\_\_

身份证号 ID no : □□□□□□□□□□□□□□□□□□□□

医院代码 Hospital No : \_\_\_\_\_ (到时打印到问卷上)

填表日期 Date : \_\_\_\_\_年\_\_\_\_月\_\_\_\_日

**孕前膳食补充剂调查表**  
**Pre-pregnancy nutrition supplement**  
**questionnaire**  
(男女共用)

**A 一般情况**

|                                                                                                                                                                                                                                                                                        |  |  |  |
|----------------------------------------------------------------------------------------------------------------------------------------------------------------------------------------------------------------------------------------------------------------------------------------|--|--|--|
| A1 联系电话（请您认真填写，以助于医生和您联系）Contact number:<br>_____(手机) _____(固定电话)<br>_____(Email)                                                                                                                                                                                                      |  |  |  |
| A2 家庭住址 Address: _____区/县_____街道/小区_____门牌号码/村                                                                                                                                                                                                                                         |  |  |  |
| A3 您的出生日期是 Birth date _____年_____月_____日                                                                                                                                                                                                                                               |  |  |  |
| A4 民族 Nationality <input type="checkbox"/> 1 汉族 <input type="checkbox"/> 2 其他（请注明）_____                                                                                                                                                                                                |  |  |  |
| A5 您的最高学历 Education <input type="checkbox"/> 1 初高中以下 <input type="checkbox"/> 2 大专本科 <input type="checkbox"/> 3 硕士研究生以上及以上                                                                                                                                                             |  |  |  |
| A6 您现在的主要职业 Occupation <input type="checkbox"/> 1 管理人员/干部 <input type="checkbox"/> 2 技术人员 <input type="checkbox"/> 3. 企业主 <input type="checkbox"/> 4 工人<br><input type="checkbox"/> 5 农民 <input type="checkbox"/> 6 个体户 <input type="checkbox"/> 7 其它_____                             |  |  |  |
| A7 上一年您的家庭年收入是：Income of a year <input type="checkbox"/> 1. <2 万元 <input type="checkbox"/> 2. (2~3.9)万 <input type="checkbox"/> 3.(5.9)万<br><input type="checkbox"/> 4.(6~9.9)万 <input type="checkbox"/> 5.(10~14.9)万 <input type="checkbox"/> 6.15 万及以上 <input type="checkbox"/> 9.不详 |  |  |  |
| A8 填表日期 Date _____年_____月_____日                                                                                                                                                                                                                                                        |  |  |  |

**B 营养补充剂使用情况**

| 营养补充剂种类<br>Nutritional supplement types                          | 叶酸<br>Folic acid                                                                                                                                                                          | 复合维生素<br>multi-vitamins                                                                                                                                                              | 单一维生素<br>Single vitamin                                                                                                                                                                                        |
|------------------------------------------------------------------|-------------------------------------------------------------------------------------------------------------------------------------------------------------------------------------------|--------------------------------------------------------------------------------------------------------------------------------------------------------------------------------------|----------------------------------------------------------------------------------------------------------------------------------------------------------------------------------------------------------------|
| 您在近三个月是否服用<br>Have you taken it in the last three months?        | <input type="checkbox"/> 1 是 <input type="checkbox"/> 0 否                                                                                                                                 | <input type="checkbox"/> 1 是 <input type="checkbox"/> 0 否                                                                                                                            | <input type="checkbox"/> 1 是 <input type="checkbox"/> 0 否                                                                                                                                                      |
| 您服用的什么品牌的营养补充剂？（如果没有对应选项请在其他处写明）<br>Brand name                   | <input type="checkbox"/> 1、创盈金斯利安多维片<br><input type="checkbox"/> 2、福施福胶囊营养素<br><input type="checkbox"/> 3、汤臣倍健<br><input type="checkbox"/> 4、安利纽崔莱铁<br><input type="checkbox"/> 5、其他_____ | <input type="checkbox"/> 1、爱乐维<br><input type="checkbox"/> 2、汤臣倍健孕妇专用<br><input type="checkbox"/> 3、惠氏玛特纳<br><input type="checkbox"/> 4、21 金维他<br><input type="checkbox"/> 5、其他_____ | <input type="checkbox"/> V <sub>C</sub><br><input type="checkbox"/> V <sub>E</sub><br><input type="checkbox"/> V <sub>B1</sub><br><input type="checkbox"/> V <sub>B2</sub><br><input type="checkbox"/> 其他_____ |
| 您这三个月的服用频率？（如果食用频率小于每天/周一一次，请填写每周/月食用几次，并勾出周/月）<br>How often did | _____次/□天 <input type="checkbox"/> 周 <input type="checkbox"/> 月                                                                                                                           | _____次/□天□周□月                                                                                                                                                                        | _____次/□天 <input type="checkbox"/> 周 <input type="checkbox"/> 月                                                                                                                                                |

| <b>营养补充剂种类</b><br>Nutritional<br>supplement<br>types               | <b>铁</b><br><b>Fe</b>                                     | <b>钙</b><br><b>Ca</b>                                     | <b>锌</b><br><b>Zn</b>                                     |
|--------------------------------------------------------------------|-----------------------------------------------------------|-----------------------------------------------------------|-----------------------------------------------------------|
| <b>您在近三个月是<br/>否服用</b><br><b>Have you taken<br/>it in the last</b> | <input type="checkbox"/> 1 是 <input type="checkbox"/> 0 否 | <input type="checkbox"/> 1 是 <input type="checkbox"/> 0 否 | <input type="checkbox"/> 1 是 <input type="checkbox"/> 0 否 |

|                    |  |  |  |
|--------------------|--|--|--|
| <b>you take in</b> |  |  |  |
|--------------------|--|--|--|

|                                                                             |                                                                                                                                                        |                                                                                                                                                                                                  |                                                                                                                                                            |
|-----------------------------------------------------------------------------|--------------------------------------------------------------------------------------------------------------------------------------------------------|--------------------------------------------------------------------------------------------------------------------------------------------------------------------------------------------------|------------------------------------------------------------------------------------------------------------------------------------------------------------|
| three months?                                                               |                                                                                                                                                        |                                                                                                                                                                                                  |                                                                                                                                                            |
| 您服用的什么品牌的营养补充剂？(如果没有,选项请在其他处写明)<br>Brand name                               | <input type="checkbox"/> 1、汤臣倍健叶酸亚铁片<br><input type="checkbox"/> 2、安利纽崔莱铁片<br><input type="checkbox"/> 3、金康倍叶酸铁片<br><input type="checkbox"/> 4、其他_____ | <input type="checkbox"/> 1、惠氏金钙尔奇<br><input type="checkbox"/> 2、君宝康孕妇钙片<br><input type="checkbox"/> 3、十月妈咪维生素 AD 钙锌咀嚼片<br><input type="checkbox"/> 4、安利钙镁片<br><input type="checkbox"/> 5、其他_____ | <input type="checkbox"/> 1、美康利健 MK 硒金牡蛎锌片<br><input type="checkbox"/> 2、汤臣倍健 锌咀嚼片<br><input type="checkbox"/> 3、宫诺肽片<br><input type="checkbox"/> 4、其他_____ |
| 您这三个月的服用频率？(如果食用频率小于每天/周一次,请填写每周/月食用几次,并勾出周/月)<br>How often did you take in | ____次/□天 □周 □月                                                                                                                                         | ____次/□天□周□月                                                                                                                                                                                     | ____次/□天 □周 □月                                                                                                                                             |

**B 营养补充剂使用情况**

|                                                                                                                                                                                                                                                                                                                                                                                                            |                                                                                                          |
|------------------------------------------------------------------------------------------------------------------------------------------------------------------------------------------------------------------------------------------------------------------------------------------------------------------------------------------------------------------------------------------------------------|----------------------------------------------------------------------------------------------------------|
| <b>C 吸烟情况</b>                                                                                                                                                                                                                                                                                                                                                                                              |                                                                                                          |
| C1 您有吸烟史吗?<br>Have you smoked cigarettes ever before?                                                                                                                                                                                                                                                                                                                                                      | <input type="checkbox"/> 1 是 <input type="checkbox"/> 0 否(跳至 F6)                                         |
| C2 在您最近的 3 个月内, 您是否吸烟?<br>Did you smoke cigarettes in 3 month                                                                                                                                                                                                                                                                                                                                              | <input type="checkbox"/> 1 是 <input type="checkbox"/> 0 否                                                |
| C3 如果是, 您平均每天吸多少支烟?<br>On average, how many cigarettes did you smoke each day in the month after your last menstrual period?                                                                                                                                                                                                                                                                               | _____ 支                                                                                                  |
| C4 如果您曾经戒过烟, 您戒了多少次?<br>How many times did you stop smoking?                                                                                                                                                                                                                                                                                                                                               | _____                                                                                                    |
| C5 在您生活的大多数时间里, 您是否暴露于他人烟草烟雾中?<br>On most days during your pregnancy, were you exposed to someone else's cigarette smoke?                                                                                                                                                                                                                                                                                  | <input type="checkbox"/> 1 是 <input type="checkbox"/> 0 否(跳至 G1)                                         |
| C6 您在哪里暴露与烟草烟雾中<br>Where were you exposed to the smoke?                                                                                                                                                                                                                                                                                                                                                    | <input type="checkbox"/> 1 仅在家中 <input type="checkbox"/> 2 仅在工作单位 <input type="checkbox"/> 3 在家和在工作单位均暴露 |
| <b>D 酒精</b>                                                                                                                                                                                                                                                                                                                                                                                                |                                                                                                          |
| D1 您最近三个月的饮酒情况? During the 3 months before or during your pregnancy, did you ever drink any alcoholic beverages?<br><input type="checkbox"/> 0.从未饮酒;<br><input type="checkbox"/> 1.尝试饮酒(曾饮至少半瓶或一听啤酒, 一小盅白酒等);<br><input type="checkbox"/> 2.现在饮酒(过去 30 天, 至少有一天喝过一杯酒);<br><input type="checkbox"/> 3.重度饮酒(过去 30 天, 至少有一天在 2 小时内喝过五杯酒);<br><input type="checkbox"/> 4.醉酒(过去 12 个月内, 因喝酒太多而感到头晕/头疼/嗜睡等醉酒症状)。 |                                                                                                          |

核查人员签名：\_\_\_\_\_
