# Supplementary material for: Shanghai Preconception Cohort (SPCC) for the association of periconceptional parental key nutritional factors with health outcomes of children with congenital heart disease: a cohort profile
Source: PubMed Central journal article supplement — BMJ Open. 2019 Nov 24;9(11):e031076. doi: 10.1136/bmjopen-2019-031076 (PMC6887077; doi:10.1136/bmjopen-2019-031076), 2019-11-24
Supplement: bmjopen-2019-031076supp003.pdf [file bmjopen-2019-031076supp003.pdf]

## Appendix 2b pregnant questionnaire

Name of pregnancy : \_\_\_\_\_

ID no : \_\_\_\_\_

## 孕期危险因素暴露调查表

## Pregnancy risk factor exposure questionnaire

**A 一般情况 General information**

|                                             |                                                                                                                                                                                                                                      |
|---------------------------------------------|--------------------------------------------------------------------------------------------------------------------------------------------------------------------------------------------------------------------------------------|
| A1 您的出生日期是 Birth date                       | _____年_____月_____日                                                                                                                                                                                                                   |
| A2 民族 Nationality                           | <input type="checkbox"/> 1 汉族 Han <input type="checkbox"/> 2 其他 other _____                                                                                                                                                          |
| A3 您的最高学历 Education                         | <input type="checkbox"/> 1 初高中以下 Mid <input type="checkbox"/> 2 大专本科 High <input type="checkbox"/> 3 硕士研究生以上及以上 College                                                                                                              |
| A4 您现在的主要职业 Occupation                      | <input type="checkbox"/> 1 管理人员/干部 <input type="checkbox"/> 2 技术人员 <input type="checkbox"/> 3. 企业主 <input type="checkbox"/> 4 工人<br><input type="checkbox"/> 5 农民 <input type="checkbox"/> 6 个体户 <input type="checkbox"/> 7 其它 _____ |
| A6 家庭住址: Address                            | _____区/县_____街道/小区_____门牌号码/村                                                                                                                                                                                                        |
| A7 联系电话 (请您认真填写, 以助于医生和您联系): Contact number | _____(手机) _____(固定电话)<br>_____(Email) _____(微信号)                                                                                                                                                                                     |

**B 本次妊娠情况**

|                                                                                                                                       |                                                                                                                                                                                           |
|---------------------------------------------------------------------------------------------------------------------------------------|-------------------------------------------------------------------------------------------------------------------------------------------------------------------------------------------|
| B1 您孕前体重通常为? Current weight                                                                                                           | _____ (公斤 Kg)                                                                                                                                                                             |
| B2 您身高是? Height                                                                                                                       | _____ (厘米 cm)                                                                                                                                                                             |
| B3 您的腰围是? Waist                                                                                                                       | _____ (厘米 cm)                                                                                                                                                                             |
| B4 您此次怀孕的末次月经时间?<br>What was the first day of the menstrual period that came right before this pregnancy (LMP)?                       | _____年_____月_____日                                                                                                                                                                        |
| B5 孕期是否发生过重大负性生活事件而使您的精神受到刺激?<br>Have you ever experienced the negative events which irritate you and generate some negative emotion? | <input type="checkbox"/> 1 是 <input type="checkbox"/> 0 否                                                                                                                                 |
| B6 生这个孩子是您第几次怀孕?<br>How many times have you been pregnant?                                                                            | _____次                                                                                                                                                                                    |
| B7 是否有不良生育史? Did you have the adverse reproductive history?                                                                           | <input type="checkbox"/> 1 有 (继续回答 B6.1) <input type="checkbox"/> 0 无 (跳至 B7)                                                                                                             |
| B6.1 流产史 Abortion                                                                                                                     | <input type="checkbox"/> 1 有 <input type="checkbox"/> 0 无                                                                                                                                 |
| B6.2 早产史 Preterm                                                                                                                      | <input type="checkbox"/> 1 有 <input type="checkbox"/> 0 无                                                                                                                                 |
| B6.3 死产史 Stillbirth                                                                                                                   | <input type="checkbox"/> 1 有 <input type="checkbox"/> 0 无                                                                                                                                 |
| B8 您是否有糖尿病和高血压疾病? Do you have hypertension or diabetes                                                                                | <input type="checkbox"/> 1 是 (继续回答 B8) <input type="checkbox"/> 0 否 (跳至 C1) <input type="checkbox"/> 999 不知道 (跳至 C1)                                                                      |
| B9 您的直系亲属中是否患有糖尿病、高血压疾病? Is there the family history of hypertension or diabetes in children's immediate family members               | <input type="checkbox"/> 1 是 (继续回答 B8) <input type="checkbox"/> 0 否 (跳至 C1) <input type="checkbox"/> 999 不知道 (跳至 C1)                                                                      |
| B10 若有, 请选择出该亲属与您的关系 (可多选) If so, please choose the relationship with the child                                                       | <input type="checkbox"/> 1. 父亲 <input type="checkbox"/> 2. 母亲 <input type="checkbox"/> 3. 爷爷 <input type="checkbox"/> 4. 奶奶 <input type="checkbox"/> 5. 兄弟 <input type="checkbox"/> 6. 姐妹 |

**C 叶酸使用**

|                                                                                                                                                                |                                                                                                                                       |                                                                                                                                       |                                                                                                                                       |
|----------------------------------------------------------------------------------------------------------------------------------------------------------------|---------------------------------------------------------------------------------------------------------------------------------------|---------------------------------------------------------------------------------------------------------------------------------------|---------------------------------------------------------------------------------------------------------------------------------------|
| C1 在您末次月经前三个月内, 您是否服用过叶酸? <input type="checkbox"/> 1 是 <input type="checkbox"/> 0 否<br>Did you take folic acid in the month before your last period?           |                                                                                                                                       |                                                                                                                                       |                                                                                                                                       |
| C2 在您末次月经之后至今, 您是否服用过叶酸? <input type="checkbox"/> 1 是 <input type="checkbox"/> 0 否<br>Did you take any folic acid after your last period and during pregnancy? |                                                                                                                                       |                                                                                                                                       |                                                                                                                                       |
|                                                                                                                                                                | 叶酸 1                                                                                                                                  | 叶酸 2                                                                                                                                  | 叶酸 3                                                                                                                                  |
| C3 药物名称(商品名)<br>Brand name                                                                                                                                     |                                                                                                                                       |                                                                                                                                       |                                                                                                                                       |
| C4 使用时间<br>When did you take it?                                                                                                                               | <input type="checkbox"/> 1 孕前 before pregnancy<br><input type="checkbox"/> 2 孕后 pregnancy<br><input type="checkbox"/> 3 孕前孕后都有 always | <input type="checkbox"/> 1 孕前 before pregnancy<br><input type="checkbox"/> 2 孕后 pregnancy<br><input type="checkbox"/> 3 孕前孕后都有 always | <input type="checkbox"/> 1 孕前 before pregnancy<br><input type="checkbox"/> 2 孕后 pregnancy<br><input type="checkbox"/> 3 孕前孕后都有 always |
| C5 是否在怀孕期间一直使用?<br>Did you take it during the rest of your pregnancy?                                                                                          | <input type="checkbox"/> 1 是 <input type="checkbox"/> 0 否                                                                             | <input type="checkbox"/> 1 是 <input type="checkbox"/> 0 否                                                                             | <input type="checkbox"/> 1 是 <input type="checkbox"/> 0 否                                                                             |
| C6 是否停止使用过?<br>Did you stop taking it?                                                                                                                         | <input type="checkbox"/> 1 是 <input type="checkbox"/> 0 否                                                                             | <input type="checkbox"/> 1 是 <input type="checkbox"/> 0 否                                                                             | <input type="checkbox"/> 1 是 <input type="checkbox"/> 0 否                                                                             |
| C7 使用频率?<br>How often did you take it?                                                                                                                         | ____次/□天 □周 □月                                                                                                                        | ____次/□天 □周 □月                                                                                                                        | ____次/□天 □周 □月                                                                                                                        |
| C8 每次的使用量<br>What is the usage per time?                                                                                                                       | 一次____片                                                                                                                               | 一次____片                                                                                                                               | 一次____片                                                                                                                               |

**D 维生素使用**

|                                                                                                                                                                                |                                                                                                  |                                                                                                  |                                                                                                  |
|--------------------------------------------------------------------------------------------------------------------------------------------------------------------------------|--------------------------------------------------------------------------------------------------|--------------------------------------------------------------------------------------------------|--------------------------------------------------------------------------------------------------|
| D1 在您末次月经的前三个月内, 您是否服用过维生素? <input type="checkbox"/> 1 是 <input type="checkbox"/> 0 否<br>Did you take any vitamins in the three months before your last period?                |                                                                                                  |                                                                                                  |                                                                                                  |
| D2 在您末次月经之后至今, 您是否服用过维生素? <input type="checkbox"/> 1 是 <input type="checkbox"/> 0 否 ( <b>跳至 E1</b> )<br>Did you take any vitamins after your last period and during pregnancy? |                                                                                                  |                                                                                                  |                                                                                                  |
|                                                                                                                                                                                | 维生素 1                                                                                            | 维生素 2                                                                                            | 维生素 3                                                                                            |
| D3 维生素名称<br>Vitamin name                                                                                                                                                       |                                                                                                  |                                                                                                  |                                                                                                  |
| D4 维生素商品名称<br>Brand name                                                                                                                                                       |                                                                                                  |                                                                                                  |                                                                                                  |
| D5 是否是医生给药?<br>Did your doctor give it to you?                                                                                                                                 | <input type="checkbox"/> 1 是 <input type="checkbox"/> 0 否                                        | <input type="checkbox"/> 1 是 <input type="checkbox"/> 0 否                                        | <input type="checkbox"/> 1 是 <input type="checkbox"/> 0 否                                        |
| D6 是否包括叶酸?<br>Does it contain folic acid?                                                                                                                                      | <input type="checkbox"/> 1 是<br><input type="checkbox"/> 0 否<br><input type="checkbox"/> 999 不知道 | <input type="checkbox"/> 1 是<br><input type="checkbox"/> 0 否<br><input type="checkbox"/> 999 不知道 | <input type="checkbox"/> 1 是<br><input type="checkbox"/> 0 否<br><input type="checkbox"/> 999 不知道 |

|                                           |                                                                                                                                       |                                                                                                                                       |                                                                                                                                       |
|-------------------------------------------|---------------------------------------------------------------------------------------------------------------------------------------|---------------------------------------------------------------------------------------------------------------------------------------|---------------------------------------------------------------------------------------------------------------------------------------|
| D7 使用时间<br>When did you take it?          | <input type="checkbox"/> 1 孕前 before pregnancy<br><input type="checkbox"/> 2 孕后 pregnancy<br><input type="checkbox"/> 3 孕前孕后都有 always | <input type="checkbox"/> 1 孕前 before pregnancy<br><input type="checkbox"/> 2 孕后 pregnancy<br><input type="checkbox"/> 3 孕前孕后都有 always | <input type="checkbox"/> 1 孕前 before pregnancy<br><input type="checkbox"/> 2 孕后 pregnancy<br><input type="checkbox"/> 3 孕前孕后都有 always |
| D8 是否停止使用过?<br>Did you stop taking it?    | <input type="checkbox"/> 1 是<br><input type="checkbox"/> 0 否                                                                          | <input type="checkbox"/> 1 是<br><input type="checkbox"/> 0 否                                                                          | <input type="checkbox"/> 1 是<br><input type="checkbox"/> 0 否                                                                          |
| D9 使用频率?<br>How often did you take it?    | ____次/□天 □周 □月                                                                                                                        | ____次/□天 □周 □月                                                                                                                        | ____次/□天 □周 □月                                                                                                                        |
| D10 每次的使用量<br>What is the usage per time? | 一次____片                                                                                                                               | 一次____片                                                                                                                               | 一次____片                                                                                                                               |

### E 其他营养补充剂使用情况 Other nutritional supplement use

| 营养补充剂种类<br>Nutritional supplement types                                         | 铁 Fe                                                                                                                                                   | 钙 Ca                                                                                                                                                                                             | 锌 Zn                                                                                                                                                       |
|---------------------------------------------------------------------------------|--------------------------------------------------------------------------------------------------------------------------------------------------------|--------------------------------------------------------------------------------------------------------------------------------------------------------------------------------------------------|------------------------------------------------------------------------------------------------------------------------------------------------------------|
| 您在近三个月是否服用<br>Did you take it around the time you became pregnant?              | <input type="checkbox"/> 1 是 <input type="checkbox"/> 0 否                                                                                              | <input type="checkbox"/> 1 是 <input type="checkbox"/> 0 否                                                                                                                                        | <input type="checkbox"/> 1 是 <input type="checkbox"/> 0 否                                                                                                  |
| 您服用的什么品牌的营养补充剂? (如果没有, 选项请在其他地方写明) Brand name                                   | <input type="checkbox"/> 1、汤臣倍健叶酸亚铁片<br><input type="checkbox"/> 2、安利纽崔莱铁片<br><input type="checkbox"/> 3、金康倍叶酸铁片<br><input type="checkbox"/> 4、其他_____ | <input type="checkbox"/> 1、惠氏金钙尔奇<br><input type="checkbox"/> 2、君宝康孕妇钙片<br><input type="checkbox"/> 3、十月妈咪维生素 AD 钙锌咀嚼片<br><input type="checkbox"/> 4、安利钙镁片<br><input type="checkbox"/> 5、其他_____ | <input type="checkbox"/> 1、美康利健 MK 硒金牡蛎锌片<br><input type="checkbox"/> 2、汤臣倍健 锌咀嚼片<br><input type="checkbox"/> 3、宫诺肽片<br><input type="checkbox"/> 4、其他_____ |
| 您这三个月的服用频率? (如果食用频率小于每天/周一次, 请填写每周/月食用几次, 并勾出周/月)<br>How often did you take it? | ____次/□天 □周 □月                                                                                                                                         | ____次/□天□周□月                                                                                                                                                                                     | ____次/□天 □周 □月                                                                                                                                             |

### F 草本药物使用

|                                                                                                                                                                                                                  |
|------------------------------------------------------------------------------------------------------------------------------------------------------------------------------------------------------------------|
| F1 在您末次月经前三个月内, 您是否使用过任何一种草本药物/传统医学药物? Did you take any herbal supplements/traditional Chinese medicine in the three months before your last period<br><input type="checkbox"/> 1 是 <input type="checkbox"/> 0 否 |
|------------------------------------------------------------------------------------------------------------------------------------------------------------------------------------------------------------------|

|                                                                                                                                                                                                                                 |                                                                   |                                                                   |                                                                   |
|---------------------------------------------------------------------------------------------------------------------------------------------------------------------------------------------------------------------------------|-------------------------------------------------------------------|-------------------------------------------------------------------|-------------------------------------------------------------------|
| F2 在您末次月经之后，您是否使用过任何一种草本药物/传统医学药物 Did you take any herbal supplements/traditional Chinese medicine after your last period and during pregnancy? ?<br><input type="checkbox"/> 1 是 <input type="checkbox"/> 0 否 ( <b>跳至 F1</b> ) |                                                                   |                                                                   |                                                                   |
|                                                                                                                                                                                                                                 | 草本药物 1 Herbal 1                                                   | 草本药物 2 Herbal 2                                                   | 草本药物 3 Herbal 3                                                   |
| F3 草本药物类型 Name of herb                                                                                                                                                                                                          | <input type="checkbox"/> 1 中成药<br><input type="checkbox"/> 2 中医草药 | <input type="checkbox"/> 1 中成药<br><input type="checkbox"/> 2 中医草药 | <input type="checkbox"/> 1 中成药<br><input type="checkbox"/> 2 中医草药 |
| F4 药物名称(如果选择中医草药,请填写中药功效)<br>The use of traditional Chinese medicine                                                                                                                                                            |                                                                   |                                                                   |                                                                   |
| F5 用药持续多少天<br>How long did you take in?                                                                                                                                                                                         | _____天                                                            | _____天                                                            | _____天                                                            |

### G 吸烟情况

|                                                                                                                                                             |                              |                                               |
|-------------------------------------------------------------------------------------------------------------------------------------------------------------|------------------------------|-----------------------------------------------|
| G1 您在怀孕前或者怀孕期间吸烟吗?<br>Did you smoke cigarettes before or during your pregnancy with the baby?                                                               | <input type="checkbox"/> 1 是 | <input type="checkbox"/> 0 否 ( <b>跳至 F9</b> ) |
| G2 在您末次月经的当月，您是否吸烟?<br>Did you smoke during the month before your last menstrual period ?                                                                   | <input type="checkbox"/> 1 是 | <input type="checkbox"/> 0 否                  |
| G3 在您末次月经的一个月后（末次月经结束直至一个月后），您是否吸烟? ( <b>跳至 5</b> )<br>Did you smoke during the month after your last menstrual period, that is between LMP and LMP+1 month | <input type="checkbox"/> 1 是 | <input type="checkbox"/> 0 否                  |
| G4 如果是，您平均每天吸多少支烟?<br>On average, how many cigarettes did you smoke each day in the month after your last menstrual period ?<br>支                           |                              |                                               |
| G5 在您怀孕期间，您是否吸烟?<br>Did you smoke during your pregnancy?                                                                                                    | <input type="checkbox"/> 1 是 | <input type="checkbox"/> 0 否 ( <b>跳至 F7</b> ) |
| G6 在您怀孕期间，您平均每天吸多少支烟?<br>On average how many cigarettes did you smoke each                                                                                  | _____ 支                      |                                               |
| G7 在您末次月经期间至今，您是否戒过吸烟?<br>Did you stop smoking at any time between your last menstrual period and the end of your pregnancy?                                | <input type="checkbox"/> 1 是 | <input type="checkbox"/> 0 否 ( <b>跳至 F9</b> ) |
| G8 您戒烟有多少次? How many times did you stop?                                                                                                                    |                              | _____ 次                                       |
| G9 在您怀孕的大多数时间里，您是否暴露于他人烟草烟雾中?<br>On most days during your pregnancy, were you exposed to someone else's cigarette smoke?                                    | <input type="checkbox"/> 1 是 | <input type="checkbox"/> 0 否 ( <b>跳至 G1</b> ) |

G10 您在哪里暴露与烟草烟雾中?

Where were you exposed to the smoke?

1 仅在家中      2 仅在工作单位      3 在家和在工作单位均暴露

## H 酒精

H1 在您怀孕前三个月至今，您是否饮用过任何含有酒精的饮料?

1 是      0 否

During the 3 months before or during your pregnancy, did you ever drink any alcoholic beverages?

H2 在这三个月内，您通常每次饮几杯酒?

\_\_\_\_\_ 杯

On those days that you drank, how many drinks did you have?

## I 环境暴露情况

I1 怀孕前三个月到现在，您是否染烫发?

1 是      0 否

Did you dye perm in the first three months of pregnancy?

I2 怀孕前三个月到现在，后您工作的地点或家里是否装修过?

1 是      0 否

Did you exposed to formaldehyde in the first three months of pregnancy?

I3 怀孕前后您是否接触过下列物质? Have you been exposed to the following substances before and after pregnancy? (Toxic chemicals)

1 除草剂    2 杀虫剂    3 灭鼠剂    4 有机溶剂    5 消毒剂  
6 金属制剂    7 有害气体    8 有害固体

## J 药物使用情况

以下问题是有关于您在末次月经之前三个月内至今期间的用药情况

|                                                       | 治疗高血压<br>药物 Medication<br>for hypertension                   | 胰岛素<br>Insulin for<br>diabetes                               | 口服降血糖<br>药物 Oral<br>hypoglycemic<br>for diabetes             | 抗癫痫药物<br>Medications for<br>epilepsy                         | 每天都要服用<br>的药物<br>Medications at<br>least once a day          |                 |
|-------------------------------------------------------|--------------------------------------------------------------|--------------------------------------------------------------|--------------------------------------------------------------|--------------------------------------------------------------|--------------------------------------------------------------|-----------------|
| 1 您是否使用过? Did you take?                               | <input type="checkbox"/> 1 是<br><input type="checkbox"/> 0 否 |                 |
| 2 您使用的药物名称? What did you take?                        | _____                                                        | _____                                                        | _____                                                        | _____                                                        | _____                                                        |                 |
| <b>如果下一个问题令您感到不安且不愿意回答，请在“拒答”上打√，我们将对您所有回答进行严格保密!</b> |                                                              |                                                              |                                                              |                                                              |                                                              |                 |
|                                                       | 安定\有助于<br>您放松药物<br>Valium\drugs<br>to help you               | 使您感觉良<br>好\精力旺盛<br>Make you<br>feel                          | 美沙酮\氧可酮\<br>其他止痛药<br>Methadone<br>oxymoron\other             | 可卡因<br>Cocaine or<br>crack cocaine                           | 海洛因<br>Heroin                                                | 大麻<br>Marijuana |

|                                   | relax                                                                                                                           | good\have<br>more energy                                                                                                        | pain killers                                                                                                                    |                                                                                                                                 |                                                                                                                                 |                                                                                                                                 |
|-----------------------------------|---------------------------------------------------------------------------------------------------------------------------------|---------------------------------------------------------------------------------------------------------------------------------|---------------------------------------------------------------------------------------------------------------------------------|---------------------------------------------------------------------------------------------------------------------------------|---------------------------------------------------------------------------------------------------------------------------------|---------------------------------------------------------------------------------------------------------------------------------|
| 1 您是否使用过?<br>Did you take?        | <input type="checkbox"/> 1 是<br><input type="checkbox"/> 0 否<br><input type="checkbox"/> 2 拒答<br><input type="checkbox"/> 9 不清楚 | <input type="checkbox"/> 1 是<br><input type="checkbox"/> 0 否<br><input type="checkbox"/> 2 拒答<br><input type="checkbox"/> 9 不清楚 | <input type="checkbox"/> 1 是<br><input type="checkbox"/> 0 否<br><input type="checkbox"/> 2 拒答<br><input type="checkbox"/> 9 不清楚 | <input type="checkbox"/> 1 是<br><input type="checkbox"/> 0 否<br><input type="checkbox"/> 2 拒答<br><input type="checkbox"/> 9 不清楚 | <input type="checkbox"/> 1 是<br><input type="checkbox"/> 0 否<br><input type="checkbox"/> 2 拒答<br><input type="checkbox"/> 9 不清楚 | <input type="checkbox"/> 1 是<br><input type="checkbox"/> 0 否<br><input type="checkbox"/> 2 拒答<br><input type="checkbox"/> 9 不清楚 |
| 2 您使用的药物名称?<br>What did you take? | _____                                                                                                                           | _____                                                                                                                           | _____                                                                                                                           | _____                                                                                                                           | _____                                                                                                                           | _____                                                                                                                           |

### I 您在怀孕期间是否患过以下疾病？

|                                                                                            |                                                           |
|--------------------------------------------------------------------------------------------|-----------------------------------------------------------|
| I.3 发热性疾病及呼吸道感染<br>Febrile illness and respiratory infections                              | <input type="checkbox"/> 1 是 <input type="checkbox"/> 0 否 |
| I.3.1 您发烧时的最高温度是多少？<br>What was the highest temperature of your fever during your illness? | _____°C                                                   |
| I.3.2 您发烧有几天？<br>How long did you have a fever?                                            | _____天                                                    |
| I.6 其他_____                                                                                |                                                           |

**调查结束，谢谢您的配合！**

调查员姓名 \_\_\_\_\_

调查日期 \_\_\_\_/\_\_\_\_/\_\_\_\_  
年 月 日
