# Supplementary material for: Shanghai Preconception Cohort (SPCC) for the association of periconceptional parental key nutritional factors with health outcomes of children with congenital heart disease: a cohort profile
Source: PubMed Central journal article supplement — BMJ Open. 2019 Nov 24;9(11):e031076. doi: 10.1136/bmjopen-2019-031076 (PMC6887077; doi:10.1136/bmjopen-2019-031076), 2019-11-24
Supplement: bmjopen-2019-031076supp004.pdf [file bmjopen-2019-031076supp004.pdf]

### Appendix 3 Variable list

| <b>Pre-pregnant variable list</b> |                            |           |
|-----------------------------------|----------------------------|-----------|
| No                                | Variables                  | Data type |
|                                   | <b>General information</b> |           |
| 1                                 | Wife id                    | Text      |
| 2                                 | Husband nation             | Text      |
| 3                                 | Husband age                | N         |
| 4                                 | Husband education          | Text      |
| 5                                 | Husband id                 | Text      |
| 6                                 | Husband occupation         | Text      |
| 7                                 | Wife nation                | Text      |
| 8                                 | Wife age                   | N         |
| 9                                 | Wife education             | Text      |
| 10                                | Wife occupation            | Text      |
| 11                                | Tel No                     | Text      |
| 12                                | Mobile phone No            | Text      |
|                                   | <b>Medical history</b>     |           |
| 13                                | Female anemia              | Category  |
| 14                                | Female EH                  | Category  |
| 15                                | Female heart disease       | Category  |
| 16                                | Female DM                  | Category  |
| 17                                | Female epilepsy            | Category  |
| 18                                | Female thyroid disease     | Category  |
| 19                                | Female CGN                 | Category  |
| 20                                | Female mental disease      | Category  |
| 21                                | Female tumour              | Category  |
| 22                                | Female TB                  | Category  |
| 23                                | Female HBV                 | Category  |
| 24                                | Female VD                  | Category  |
| 25                                | Male anemia                | Category  |
| 26                                | Male EH                    | Category  |
| 27                                | Male heart disease         | Category  |
| 28                                | Male DM                    | Category  |
| 29                                | Male epilepsy              | Category  |
| 30                                | Male thyroid disease       | Category  |
| 31                                | Male CGN                   | Category  |
| 32                                | Male mental disease        | Category  |
| 33                                | Male tumour                | Category  |
| 34                                | Male TB                    | Category  |
| 35                                | Male HBV                   | Category  |
| 36                                | Male VD                    | Category  |

|    |                                           |          |
|----|-------------------------------------------|----------|
|    | <b>Vaccine</b>                            |          |
| 37 | Female rubella vaccine                    | Category |
| 38 | Female hepB vaccine                       | Category |
| 39 | Male hepB vaccine                         | Category |
|    | <b>Drug use</b>                           |          |
| 40 | Female current medicine                   | Category |
| 41 | Female medicine name                      | Category |
| 42 | Male current medicine                     | Category |
| 43 | Male medicine name                        | Category |
|    | <b>Childbearing history</b>               |          |
| 44 | Birth history                             | Category |
| 45 | Pregnancy times                           | Category |
| 46 | Live birth                                | Category |
| 47 | Dead fetus                                | Category |
| 48 | Dead birth                                | Category |
| 49 | Term delivery                             | Category |
| 50 | Premature delivery                        | Category |
| 51 | Natural abortion                          | Category |
| 52 | Abactio                                   | Category |
| 53 | Children number                           | Category |
| 54 | Birth defect                              | Category |
| 55 | Defect type                               | Category |
| 56 | Menarche age                              | Category |
| 57 | Period menstruation                       | Category |
| 58 | Menstrual cycle                           | Category |
| 59 | Menstrual quantity                        | Category |
| 60 | LMP                                       | Date     |
|    | <b>Family history of disease</b>          |          |
| 61 | Female family history thalassemia         | Category |
| 62 | Female family history albinism            | Category |
| 63 | Female family history favism              | Category |
| 64 | Female family history hemophilia          | Category |
| 65 | Female family history CHD                 | Category |
| 66 | Female family history DS                  | Category |
| 67 | Female family history openNTDs            | Category |
| 68 | Female family history DM                  | Category |
| 69 | Female family history dysnoesia           | Category |
| 70 | Female family history daysaudia           | Category |
| 71 | Female family history viaual disorder     | Category |
| 72 | Female family history neuropsychiatric    | Category |
| 73 | Female family history other birth defects | Category |
| 74 | Female family history fetal death         | Category |
| 75 | Female family history intermarry          | Category |

|     |                                         |          |
|-----|-----------------------------------------|----------|
| 76  | Female family history relations         | Category |
| 77  | Male family history thalassemia         | Category |
| 78  | Male family history albinism            | Category |
| 79  | Male family history favism              | Category |
| 80  | Male family history hemophilia          | Category |
| 81  | Male family history CHD                 | Category |
| 82  | Male family history DS                  | Category |
| 83  | Male family history openNTDs            | Category |
| 84  | Male family history DM                  | Category |
| 85  | Male family history dysnoesia           | Category |
| 86  | Male family history dysaudia            | Category |
| 87  | Male family history visual disorder     | Category |
| 88  | Male family history neuropsychiatric    | Category |
| 89  | Male family history other birth defects | Category |
| 90  | Male family history fetal death         | Category |
| 91  | Male family history intermarry          | Category |
| 92  | Male family history relations           | Category |
|     | <b>Anthroposomatology</b>               |          |
| 93  | Female height                           | Numeric  |
| 94  | Female weight                           | Numeric  |
| 95  | Female BMI                              | Numeric  |
| 96  | Female heart rate                       | Numeric  |
| 97  | Female SBP                              | Numeric  |
| 98  | Female SDP                              | Numeric  |
| 99  | Male height                             | Numeric  |
| 100 | Male weight                             | Numeric  |
| 101 | Male BMI                                | Numeric  |
| 102 | Male heart rate                         | Numeric  |
| 103 | Male SBP                                | Numeric  |
| 104 | Male SDP                                | Numeric  |
|     | <b>Lab data</b>                         |          |
| 105 | Leucorrhea check                        | Numeric  |
| 106 | Clue cell                               | Numeric  |
| 107 | Monilia infection                       | Numeric  |
| 108 | Trichomonas                             | Numeric  |
| 109 | Cleanness                               | Numeric  |
| 110 | Whiff test                              | Numeric  |
| 111 | PH                                      | Numeric  |
| 112 | Wom blood analysis                      | Numeric  |
| 113 | Female hb                               | Numeric  |
| 114 | Female wbc                              | Numeric  |
| 115 | Female rbc                              | Numeric  |
| 116 | Wom urine test                          | Numeric  |

|                                       |                                             |         |
|---------------------------------------|---------------------------------------------|---------|
| 117                                   | Female ABO                                  | Numeric |
| 118                                   | Female Rh                                   | Numeric |
| 119                                   | Female GLU                                  | Numeric |
| 120                                   | Female GLU levels                           | Numeric |
| 121                                   | Female NG                                   | Numeric |
| 122                                   | Female chlamydia                            | Numeric |
| 123                                   | Female syphilis                             | Numeric |
| 124                                   | Female HIV                                  | Numeric |
| 125                                   | Female ALT                                  | Numeric |
| 126                                   | Female ALT levels                           | Numeric |
| 127                                   | Female HBs-Ag                               | Numeric |
| 128                                   | Female HBs-Ab                               | Numeric |
| 129                                   | Female HBe-Ag                               | Numeric |
| 130                                   | Female HBe-Ab                               | Numeric |
| 131                                   | Female HBc-Ab                               | Numeric |
| 132                                   | Female HCV-Ab                               | Numeric |
| 133                                   | Female CMV IgM                              | Numeric |
| 134                                   | Female CMV IgG                              | Numeric |
| 135                                   | Female RV IgM                               | Numeric |
| 136                                   | Female RV IgG                               | Numeric |
| 137                                   | Female TOX IgM                              | Numeric |
| 138                                   | Female TOX IgG                              | Numeric |
| 139                                   | Male blood analysis                         | Numeric |
| 140                                   | Male hb                                     | Numeric |
| 141                                   | Male wbc                                    | Numeric |
| 142                                   | Male rbc                                    | Numeric |
| <b>During-pregnancy variable list</b> |                                             |         |
|                                       | <b>Basic information</b>                    |         |
| 1                                     | Hospital card number                        | Text    |
| 2                                     | Inpatient number                            | Text    |
| 3                                     | Name                                        | Text    |
| 4                                     | Age                                         | Numeric |
| 5                                     | Pregnant times                              | Numeric |
| 6                                     | Delivery times                              | Numeric |
| 7                                     | Last menstrual period                       | Date    |
| 8                                     | Gestational week at the first visit         | Numeric |
| 9                                     | The first visit date                        | Date    |
| 10                                    | Height                                      | Numeric |
| 11                                    | Weight                                      | Numeric |
| 12                                    | Systolic blood pressure at the first visit  | Numeric |
| 13                                    | Diastolic blood pressure at the first visit | Numeric |

|    |                                                 |         |
|----|-------------------------------------------------|---------|
| 14 | Occupation                                      | Text    |
| 15 | Education                                       | Text    |
|    | <b>Antenatal care record</b>                    |         |
| 16 | Weight at each antenatal care                   | Numeric |
| 17 | Systolic blood pressure at each antenatal care  | Numeric |
| 18 | Diastolic blood pressure at each antenatal care | Numeric |
| 19 | Gestational week at each antenatal care         | Numeric |
| 20 | Antenatal care date                             | Date    |
|    | <b>Lab data</b>                                 |         |
| 21 | Cytomegalovirus                                 | Numeric |
| 22 | Cytomegalovirus examination date                | Date    |
| 23 | Rubella virus                                   | Numeric |
| 24 | Rubella virus examination date                  | Date    |
| 25 | Toxoplasmosis                                   | Numeric |
| 26 | Toxoplasmosis examination date                  | Date    |
| 27 | Syphilis screening                              | Numeric |
| 28 | Syphilis screening examination date             | Date    |
| 29 | Fasting blood-glucose                           | Numeric |
| 30 | Fasting blood-glucose examination date          | Date    |
| 31 | HCT(hematokrit)                                 | Numeric |
| 32 | HCT(hematokrit) examination date                | Date    |
| 33 | Serum folate                                    | Numeric |
| 34 | Serum folate examination date                   | Date    |
| 35 | HCY(homocysteine)                               | Numeric |
| 36 | HCY(homocysteine) examination date              | Date    |
| 37 | OGTT 0 hours                                    | Numeric |
| 38 | OGTT 1 hours                                    | Numeric |
| 39 | OGTT 2 hours                                    | Numeric |
| 40 | OGTT examination date                           | Date    |
| 41 | Triglyceride                                    | Numeric |
| 42 | Triglyceride examination date                   | Date    |
| 43 | Total cholesterol                               | Numeric |
| 44 | Total cholesterol examination date              | Date    |
| 45 | Hemoglobin                                      | Numeric |
| 46 | Hemoglobin examination date                     | Date    |
|    | <b>Delivery date</b>                            |         |
| 47 | Gestational week at delivery                    | Numeric |
| 48 | Delivery mode                                   | Text    |
| 49 | Birth weight                                    | Numeric |
| 50 | Birth weight(second baby)                       | Numeric |
| 51 | Systolic blood pressure at delivery             | Numeric |
| 52 | Diastolic blood pressure at delivery            | Numeric |
| 53 | Apgar scoring                                   | Numeric |

|                                                                                                         |                                                                         |         |
|---------------------------------------------------------------------------------------------------------|-------------------------------------------------------------------------|---------|
| 54                                                                                                      | Delivery date                                                           | Date    |
| 55                                                                                                      | Birth defect records                                                    | Text    |
| 56                                                                                                      | Weight blood pressure at delivery                                       | Numeric |
| <b>Offspring variable list</b>                                                                          |                                                                         |         |
|                                                                                                         | <b>0 - 6 years (6 weeks, 6 months, 12 months, 36 months, 60 months)</b> |         |
| 1                                                                                                       | Name                                                                    | Text    |
| 2                                                                                                       | ID number                                                               | Text    |
| 3                                                                                                       | Weight                                                                  | Numeric |
| 4                                                                                                       | Height/ Length                                                          | Numeric |
| 5                                                                                                       | Vision detection                                                        | Numeric |
| 6                                                                                                       | DDST: Denver developmental screening test                               | Numeric |
|                                                                                                         | <b>6 - 18 years (each year)</b>                                         |         |
| 7                                                                                                       | Weight                                                                  | Numeric |
| 8                                                                                                       | Height                                                                  | Numeric |
| 9                                                                                                       | Diastolic blood pressure                                                | Numeric |
| 10                                                                                                      | Systolic blood pressure                                                 | Numeric |
| 11                                                                                                      | Vision detection                                                        | Numeric |
| 12                                                                                                      | Vital capacity                                                          | Numeric |
| 13                                                                                                      | Physical fitness measurement (running, jumping, solid balls, etc)       | Text    |
| The clinical diagnosis during 0 – 18 years will be extracted from the routine medical system each year. |                                                                         |         |
