# Supplementary material for: Shanghai Preconception Cohort (SPCC) for the association of periconceptional parental key nutritional factors with health outcomes of children with congenital heart disease: a cohort profile
Source: PubMed Central journal article supplement — BMJ Open. 2019 Nov 24;9(11):e031076. doi: 10.1136/bmjopen-2019-031076 (PMC6887077; doi:10.1136/bmjopen-2019-031076), 2019-11-24
Supplement: bmjopen-2019-031076supp005.pdf [file bmjopen-2019-031076supp005.pdf]

## **Future Plan of Shanghai PreConception Cohort, Shanghai, China (SPCC)**

The Shanghai PreConception Cohort (SPCC) is a long-term cohort and meets the “Cohort profile” requirement. We have a complete plan to follow-up offspring to the age of 18 years old. The cohort will be financially supported by different grants. The current manuscript focuses on the first phase, the establishment of the baseline and our first main outcome, the congenital heart disease (CHD).

The second phase of this cohort study is from birth to 6 years old. Follow-up work will rely on Shanghai Community health care centers-child care. The third phase is from 6 to the age of 18 (school age). We will cooperate with Shanghai Student Health and Fitness Surveillance Center for the follow-up of the school age children.

Multiple outcomes for pediatrics, including growth, physical and neuro-developments, obesity, common and rare diseases will be investigated. Nested case-control design will be used for rare outcomes.

## The data collection plan for infants and children

|                                                                                                                                                                             | At birth | 6 weeks | 6 months | 12 months | 36 months | 60 months | 6 – 18 years* |
|-----------------------------------------------------------------------------------------------------------------------------------------------------------------------------|----------|---------|----------|-----------|-----------|-----------|---------------|
| General information (gender, ID number, Home Address, etc)                                                                                                                  | √        | √       |          |           |           |           |               |
| Delivery outcome (Congenital malformation, preterm birth, miscarriage, stillbirth)                                                                                          | √        |         |          |           |           |           |               |
| Body measurement(weight, height, waistline, hipline)                                                                                                                        | √        | √       | √        | √         | √         | √         | √             |
| Diet investigation (questionnaire)                                                                                                                                          | √        | √       | √        | √         | √         | √         | √             |
| Neurobehavioral developmental assessment (DDST <sup>§</sup> )                                                                                                               |          | √       | √        | √         | √         | √         |               |
| Anthropometrics data (Shanghai Community health care centers-child care and Shanghai Student Health and Fitness Surveillance Center)<br>weight, height, waist circumference | √        | √       | √        | √         | √         | √         | √             |
| Physical fitness measurement (running, jumping, solid balls, etc)                                                                                                           |          |         |          |           |           |           | √             |
| Blood pressure measurement, annually                                                                                                                                        |          |         |          |           |           |           | √             |
| Hemachrome (anemia)                                                                                                                                                         |          |         |          |           |           |           | √             |
| Renal functions, at grade 9 and 12                                                                                                                                          |          |         |          |           |           |           | √             |
| Cardiovascular-related chronic diseases<br>(Hypertension, Obesity, Diabetes/Pre-diabetes and Dyslipidemia)                                                                  |          |         |          |           |           |           | √             |
| Venous blood <sup>#</sup>                                                                                                                                                   |          |         |          |           |           |           | √             |

Note: \* Shanghai Student Health and Fitness Surveillance Center routinely conducts all-round physical examinations for students in the school as a health care policy for Shanghai students. It is usually in September-November of each year.

§ DDST: Denver developmental screening test.

# Venous blood will be collected at 12, 15 and 18 years of age.
